# Supplementary material for: Treatment of Winery Wastewater by Combined Almond Skin Coagulant and Sulfate Radicals: Assessment of HSO5− Activators
Source: MDPI journal article supplement (doi:10.3390/ijerph20032486), 2023-01-30
Supplement: s1 [file s1]

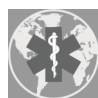

Supplementary material

# Treatment of Winery Wastewater by Combined Almond Skin Coagulant and Sulfate Radicals: Assessment of HSO<sub>5</sub><sup>-</sup> Activators

Nuno Jorge <sup>1,2,\*</sup>, Ana R. Teixeira <sup>2</sup>, Lisete Fernandes <sup>2</sup>, Sílvia Afonso <sup>3</sup>, Ivo Oliveira <sup>3</sup>, Berta Gonçalves <sup>3</sup>, Marco S. Lucas <sup>2</sup> and José A. Peres <sup>2</sup>

<sup>1</sup> Escuela Internacional de Doctorado (EIDO), Campus da Auga, Campus Universitario de Ourense, Universidade de Vigo, As Lagoas 32004, Ourense, Spain

<sup>2</sup> Centro de Química de Vila Real (CQVR), Departamento de Química, Universidade de Trás-os-Montes e Alto Douro (UTAD), Quinta de Prados 5000-801, Vila Real, Portugal

<sup>3</sup> Centre for the Research and Technology of Agro-Environmental and Biological Sciences—CITAB, University of Trás-os-Montes e Alto Douro, UTAD, Quinta de Prados, 5000-801 Vila Real, Portugal

\* Correspondence: jperes@utad.pt (J.A.P.)

**Table S1.** Concentration of total phenolic, flavonoids, O-diphenol and DPPH present in almond skin extract.

|     | Total phenolic | Flavonoids  | O-diphenol  | DPPH        |
|-----|----------------|-------------|-------------|-------------|
|     | mg GAE/g       | mg CE/g     | mg CAE/g    | µg Trolox/g |
| ASE | 6.51 ± 0.62    | 4.30 ± 0.16 | 0.65 ± 0.05 | 8.93 ± 0.34 |

**Table S2.** Analysis of variance.

| Source                             | DF | Adj SS  | Adj MS  | F-Value | P-Value |
|------------------------------------|----|---------|---------|---------|---------|
| Model                              | 9  | 4308.97 | 478.77  | 6.43    | 0.027   |
| Linear                             | 3  | 3419.70 | 1139.90 | 15.30   | 0.006   |
| PMS                                | 1  | 2204.48 | 2204.48 | 29.59   | 0.003   |
| Co <sup>2+</sup>                   | 1  | 846.66  | 846.66  | 11.36   | 0.020   |
| Radiation                          | 1  | 368.56  | 368.56  | 4.95    | 0.077   |
| Square                             | 3  | 432.91  | 144.30  | 1.94    | 0.242   |
| PMS*PMS                            | 1  | 229.71  | 229.71  | 3.08    | 0.139   |
| Co <sup>2+</sup> *Co <sup>2+</sup> | 1  | 219.63  | 219.63  | 2.95    | 0.147   |
| Radiation*Radiation                | 1  | 36.93   | 36.93   | 0.50    | 0.513   |
| 2-Way Interaction                  | 3  | 456.35  | 152.12  | 2.04    | 0.227   |
| PMS*Co <sup>2+</sup>               | 1  | 408.04  | 408.04  | 5.48    | 0.066   |
| PMS*Radiation                      | 1  | 0.01    | 0.01    | 0.00    | 0.991   |
| Co <sup>2+</sup> *Radiation        | 1  | 48.30   | 48.30   | 0.65    | 0.457   |
| Error                              | 5  | 372.52  | 74.50   |         |         |
| Lack-of-Fit                        | 3  | 372.52  | 124.17  | *       | *       |
| Pure Error                         | 2  | 0.00    | 0.00    |         |         |
| Total                              | 14 | 4681.49 |         |         |         |

**Table S3.** Model summary.

| Standard deviation (SD) | R-squared | Adj R-squared | Predicted R-squared |
|-------------------------|-----------|---------------|---------------------|
| 8.63160                 | 92.04%    | 77.72%        | 0.00%               |
